# Supplementary material
Source: publisher site journal article supplement (https://www.dovepress.com/article/469913)
Supplement: Supplementary file 1 [file get_supplementary_file.php]

**SUPPORTING INFORMATION**

Supplementary table1 Linearity of HPLC method

|  | Concentration of TEM (mg/mL) | Area under peak |
| --- | --- | --- |
| 1 | 0.001 | 50.4 |
| 2 | 0.005 | 247.1 |
| 3 | 0.01 | 475.2 |
| 4 | 0.05 | 2316.0 |
| 5 | 0.1 | 4640.0 |
| 6 | 0.2 | 9232.8 |
| 7 | 0.25 | 11860.9 |
| 8 | 0.4 | 18232.4 |

HPLC: High Performance Liquid Chromatography; TEM: Temsirolimus

Supplementary table2 Detection limit of HPLC method

| Detection limit | NO. | Area under peak | Mean (Area) | RSD (Area) | S/N | Mean (S/N) | RSD (S/N) |
| --- | --- | --- | --- | --- | --- | --- | --- |
| 0.00003mg/mL | 1 | 1.6 | 1.63 | 3.535% | 5.2 | 5.13 | 1.125% |
| 2 | 1.6 | 5.1 |
| 3 | 1.7 | 5.1 |

HPLC: High Performance Liquid Chromatography; RSD: relative standard deviation

Supplementary table3 Quantification limit of HPLC method

| Quantification limit | NO. | Area under peak | Mean (Area) | RSD (Area) | S/N | Mean (S/N) | RSD (S/N) |
| --- | --- | --- | --- | --- | --- | --- | --- |
| 0.0001mg/mL | 1 | 5.5 | 5.50 | 3.636% | 18.6 | 17.50 | 6.590% |
| 2 | 5.3 | 16.3 |
| 3 | 5.7 | 17.6 |

HPLC: High Performance Liquid Chromatography; RSD: relative standard deviation

Supplementary table4 System Suitability of HPLC method

| NO. | Area under peak | Mean  (Area) | RSD  (Area) | Time | Mean  (Time) | RSD  (Time) | Symmetry factor | R | N |
| --- | --- | --- | --- | --- | --- | --- | --- | --- | --- |
| 1 | 2333.3 | 2329.37 | 0.122% | 10.887 | 10.794 | 0.454% | 1.01 | 6.41 | 8973 |
| 2 | 2325.2 | 10.749 | 1.01 | 6.45 | 8762 |
| 3 | 2331.7 | 10.791 | 1.01 | 6.50 | 8812 |
| 4 | 2329.1 | 10.781 | 1.01 | 6.46 | 8794 |
| 5 | 2328.9 | 10.760 | 1.01 | 6.40 | 8817 |
| 6 | 2328.0 | 10.793 | 1.01 | 6.49 | 8747 |

HPLC: High Performance Liquid Chromatography; RSD: relative standard deviation

Supplementary table5 Precision of HPLC method

| NO. | Area under peak | Mean  (Area) | RSD（1） | RSD (Area) | Time | Mean  (Time) | RSD（1） | RSD (Time) |
| --- | --- | --- | --- | --- | --- | --- | --- | --- |
| 1 | 2411.4 | 2390.4 | 1.328% | 0.977% | 10.828 | 10.882 | 0.358% | 0.258% |
| 2 | 2428.0 | 10.845 |
| 3 | 2413.9 | 10.885 |
| 4 | 2352.4 | 10.901 |
| 5 | 2357.9 | 10.934 |
| 6 | 2378.8 | 10.897 |
| NO. | Area under peak | Mean  (Area) | RSD（2） | Time | Mean  (Time) | RSD（2） |
| 7 | 2368.7 | 2377.2 | 0.379% | 10.870 | 10.878 | 0.130% |
| 8 | 2387.6 | 10.897 |
| 9 | 2380.9 | 10.881 |
| 10 | 2372.4 | 10.890 |
| 11 | 2367.2 | 10.865 |
| 12 | 2386.6 | 10.862 |

HPLC: High Performance Liquid Chromatography; RSD: relative standard deviation

Supplementary table 6 Evaluation of HPLC method Ruggedness

| NO. | Area under peak | Mean  (Area) | RSD  (Area) | Time | Mean  (Time) | RSD  (Time) |
| --- | --- | --- | --- | --- | --- | --- |
| The original method | 2407.5 | 2388.27 | 5.365% | 11.195 | 11.146 | 8.769% |
| 276nm | 2343.2 | 11.195 |
| 280nm | 2325.6 | 11.195 |
| 0.9mL/min | 2669.3 | 12.031 |
| 1.1mL/min | 2174.6 | 10.077 |
| ACN：H2O=68：32 | 2393.5 | 12.961 |
| ACN：H2O=72：28 | 2401.7 | 9.611 |
| Column temperature：58℃ | 2398.8 | 11.143 |
| Column temperature：62℃ | 2380.2 | 10.904 |

HPLC: High Performance Liquid Chromatography; RSD: relative standard deviation; ACN: Acetonitrile

Supplementary table7 EE of pH-responsive TEM-loaded micelles.

|  | Area under peak  (before centrifugation） | Area under peak  (after centrifugation） | EE |
| --- | --- | --- | --- |
| pH-responsive TEM nanomicelles | 2116.9 | 2016.7 | 95.27% |

EE: Encapsulation Efficiency; TEM:Temsirolimus
